# Supplementary material for: Sexually transmitted infections in HIV-infected people in Switzerland: cross-sectional study
Source: PeerJ. 2014 Aug 26;2:e537. doi: 10.7717/peerj.537 (PMC4157241; doi:10.7717/peerj.537)
Supplement: Supplemental Information 1 — The workbook contains five worksheets with instructions for importing into Stata. Each worksheet contains the raw data used to generate one of the tables in the manuscript. [file peerj-02-537-s001.xlsx]

## Sheet: Description
The workbook contains five worksheets
Each worksheet contains the raw data used to generate one of the tables in the manuscript
Variable names in the first row are brief descriptions that can be easily mapped to the variables in the tables
We used Stata version 13.1 (StataCorp, College Station, TX) to export the data and for all data analyses
The Stata command "import excel" will import the data for each worksheet. For example (to import data for Table 5, with the first row containing the variable names):
import excel using 2329_pubdata_peerJ.xls, sheet(table5) firstrow clear

## Sheet: table1
sexual_orientation	sex	riskgroup_n	country_birth	age2009	cd4	art_everstarted_before2009	last_rna_bef2009_below40
heterosexual	male	HET	Other	47	576	yes	yes
homo/bisexual	male	MSM	Switzerland	54		yes
heterosexual	male	OTHER		28	268	yes	yes
homo/bisexual	male	MSM	Switzerland	50	963	yes	yes
heterosexual	female	HET	Switzerland	46	730	yes	yes
heterosexual	female	HET	Switzerland	44	373	yes	yes
homo/bisexual	male	MSM		21	669	no	no
heterosexual	female	IDU	Switzerland	42	581	yes	yes
heterosexual	female	HET	Switzerland	48	498	yes	yes
heterosexual	female	HET		28	490	yes	yes
heterosexual	male	UNKNOWN	Switzerland	42	372	yes	yes
heterosexual	female	HET		47	366	no	no
heterosexual	female	HET	Other	28	362	yes	no
homo/bisexual	male	MSM	Switzerland	42	1222	no	no
homo/bisexual	male	MSM		39	590	no	no
homo/bisexual	male	MSM	Switzerland	43		no
homo/bisexual	male	MSM		68	757	yes	yes
homo/bisexual	male	MSM	Switzerland	46		no
homo/bisexual	male	MSM		46		no
homo/bisexual	male	MSM	Switzerland	44	413	yes	yes
homo/bisexual	male	MSM		38	617	no	yes
homo/bisexual	male	MSM		41	97	yes	yes
homo/bisexual	male	MSM	Switzerland	50	730	yes	yes
heterosexual	male	HET	Switzerland	41	1140	yes	yes
homo/bisexual	male	MSM		41	509	yes	no
homo/bisexual	male	MSM		48	719	yes	yes
homo/bisexual	male	MSM	Switzerland	48	651	yes	yes
heterosexual	female	HET	Switzerland	60	451	yes	yes
homo/bisexual	male	MSM		35	570	no	no
heterosexual	male	HET		29	528	yes	yes
heterosexual	male	HET	Switzerland	40	428	no	no
heterosexual	male	HET	Other	34	685	yes
heterosexual	male	IDU	Switzerland	55	604	yes	yes
heterosexual	male	HET	Other	45	305	yes	yes
homo/bisexual	male	MSM	Switzerland	54	374	yes	yes
heterosexual	male	HET	Other	41	378	yes	yes
heterosexual	male	IDU	Switzerland	31	512	yes	yes
heterosexual	male	HET		49		no
homo/bisexual	male	MSM	Switzerland	49	354	yes	yes
homo/bisexual	male	MSM	Switzerland	49	188	yes	yes
homo/bisexual	male	IDU		50	632	yes	yes
homo/bisexual	male	MSM		34		no
heterosexual	female	HET	Other	35	288	yes	no
heterosexual	female	HET	Other	38	894	yes	yes
heterosexual	female	HET	Other	32	612	yes	no
heterosexual	female	IDU		47	330	yes	yes
homo/bisexual	male	MSM	Switzerland	55	343	yes	no
heterosexual	male	IDU		45	450	yes	yes
heterosexual	male	IDU	Switzerland	35	372	yes	yes
homo/bisexual	male	MSM		31		no	no
heterosexual	male	MSM	Switzerland	50	325	no	no
heterosexual	male	PERINAT	Switzerland	21	1404	yes	yes
homo/bisexual	male	MSM	Other	45	307	no	no
heterosexual	female	HET	Other	33	580	no	no
heterosexual	female	HET	Other	42	571	yes	yes
heterosexual	female	HET		42	292	yes	yes
heterosexual	male	IDU	Switzerland	48	758	yes	yes
heterosexual	male	HET	Switzerland	59	750	yes	yes
homo/bisexual	male	MSM	Switzerland	49	803	yes	yes
homo/bisexual	male	MSM	Switzerland	50	558	yes	yes
heterosexual	male	HET	Other	39	647	yes	yes
heterosexual	male	UNKNOWN		38	2617	yes	yes
homo/bisexual	male	MSM		50	414	yes	no
homo/bisexual	male	MSM	Switzerland	32	448	no	no
homo/bisexual	male	MSM	Switzerland	47	471	yes	yes
homo/bisexual	male	MSM	Other	46	256	yes	yes
homo/bisexual	male	MSM	Other	38	297	yes	yes
homo/bisexual	male	MSM	Switzerland	46	590	yes	yes
homo/bisexual	male	MSM		48	504	yes	yes
homo/bisexual	male	MSM	Switzerland	24	467	yes	yes
homo/bisexual	female	HET	Other	40	236	yes	yes
homo/bisexual	male	MSM	Other	31	179	yes	yes
homo/bisexual	male	MSM	Switzerland	50	282	yes	yes
homo/bisexual	male	MSM		40	508	yes	yes
homo/bisexual	male	MSM	Switzerland	46	202	yes	yes
heterosexual	female	HET	Other	47	508	yes	no
homo/bisexual	male	MSM	Switzerland	43	336	no	no
heterosexual	male	IDU	Switzerland	50	864	yes	yes
heterosexual	female	HET		32	791	yes	yes
heterosexual	male	HET		44	500	yes	yes
heterosexual	male	IDU		44	232	yes	yes
heterosexual	male	IDU		56	599	yes	yes
heterosexual	male	HET	Switzerland	45	728	yes	yes
homo/bisexual	male	MSM		60	587	yes	yes
heterosexual	male	HET	Switzerland	46	605	yes	yes
homo/bisexual	male	IDU		59	12	yes	yes
homo/bisexual	male	MSM	Switzerland	47	363	yes	yes
homo/bisexual	male	MSM	Switzerland	48	468	no	no
heterosexual	male	IDU	Switzerland	43	605	yes	yes
homo/bisexual	male	UNKNOWN	Switzerland	45	1061	yes	yes
homo/bisexual	male	MSM	Switzerland	50		no
homo/bisexual	male	MSM	Switzerland	43	418	yes	yes
homo/bisexual	male	MSM		48	517	yes	yes
heterosexual	male	HET	Switzerland	44	481	no	no
heterosexual	female	HET		42	549	yes	yes
homo/bisexual	female	UNKNOWN		48	632	yes	yes
heterosexual	male	HET		55	734	yes	yes
homo/bisexual	male	MSM		57	337	yes	yes
homo/bisexual	male	UNKNOWN	Other	59	647	yes	yes
heterosexual	female	HET	Switzerland	37	446	yes	yes
homo/bisexual	male	MSM	Switzerland	38	503	yes	yes
homo/bisexual	male	MSM	Switzerland	38	630	no	no
homo/bisexual	male	MSM	Switzerland	59	557	yes	yes
heterosexual	female	IDU	Switzerland	52	325	yes	yes
homo/bisexual	male	MSM	Switzerland	57	402	yes	yes
heterosexual	male	HET	Switzerland	52	49	no	no
homo/bisexual	male	MSM	Switzerland	44	1018	yes	yes
heterosexual	male	HET		48	339	yes	no
heterosexual	female	HET	Switzerland	28	1356	yes	yes
heterosexual	female	IDU		45	361	yes	yes
homo/bisexual	male	MSM	Switzerland	56	416	yes	yes
heterosexual	male	IDU		42	590	yes	yes
homo/bisexual	male	MSM	Switzerland	45	609	yes	yes
homo/bisexual	male	MSM	Switzerland	55	217	yes	yes
heterosexual	female	HET	Switzerland	42	395	yes	yes
homo/bisexual	male	MSM	Switzerland	51	310	yes	yes
homo/bisexual	male	MSM	Switzerland	42	477	no	no
homo/bisexual	male	MSM		80	1158	yes	yes
heterosexual	male	HET		45	256	yes	no
heterosexual	male	HET		48	444	yes	yes
homo/bisexual	male	MSM	Switzerland	48	338	yes	yes
heterosexual	male	HET	Switzerland	60	467	yes	yes
heterosexual	female	HET	Other	35	377	yes	yes
heterosexual	male	IDU		37	882	no	no
heterosexual	male	HET		39	151	yes	yes
homo/bisexual	male	MSM		47	85	yes	yes
heterosexual	male	MSM		58	722	yes	yes
heterosexual	female	HET	Other	35	759	yes	no
homo/bisexual	male	MSM	Other	24	418	no	no
heterosexual	male	IDU		37	336	yes	yes
heterosexual	male	HET	Other	42	351	no	no
homo/bisexual	male	MSM	Switzerland	50	616	yes	yes
homo/bisexual	male	MSM	Switzerland	45	677	yes	yes
heterosexual	male	HET	Switzerland	52	541	yes	yes
heterosexual	female	HET	Switzerland	43	621	no	no
homo/bisexual	male	MSM	Switzerland	60	837	yes	yes
homo/bisexual	male	MSM		53	438	yes	yes
heterosexual	male	HET	Switzerland	45	950	yes	yes
heterosexual	male	HET		35	203	yes	yes
homo/bisexual	male	MSM		62	531	yes	yes
heterosexual	male	HET	Other	44	228	yes	yes
homo/bisexual	male	MSM	Other	53	405	yes	yes
homo/bisexual	male	MSM		44	459	yes	yes
heterosexual	female	HET	Switzerland	42	383	no	no
heterosexual	male	IDU		57	330	yes	yes
homo/bisexual	male	MSM	Other	46	508	no	no
heterosexual	female	HET		31	967	yes	yes
heterosexual	male	HET	Switzerland	63	533	yes	yes
homo/bisexual	male	MSM	Switzerland	56	372	yes	yes
homo/bisexual	male	MSM	Switzerland	59	731	yes	yes
homo/bisexual	male	MSM	Switzerland	48	515	yes	yes
heterosexual	female	HET	Switzerland	59	749	yes	yes
heterosexual	male	HET	Switzerland	44	562	yes	yes
homo/bisexual	male	MSM	Switzerland	46	714	yes	yes
heterosexual	male	HET		30	345	yes	yes
homo/bisexual	male	MSM	Switzerland	59	388	yes	yes
homo/bisexual	male	MSM		44	575	yes	yes
heterosexual	female	HET	Switzerland	32	291	no	no
heterosexual	male	HET	Other	34	358	yes	yes
heterosexual	male	IDU	Switzerland	44	338	yes	yes
heterosexual	male	HET		54		no
homo/bisexual	male	MSM		44	427	yes	yes
heterosexual	male	HET		30	384	no	no
homo/bisexual	male	MSM		41	638	no	no
heterosexual	male	MSM	Switzerland	53	375	yes	yes
homo/bisexual	male	MSM	Switzerland	38	371	yes	yes
heterosexual	female	HET	Other	47	274	yes	yes
homo/bisexual	male	MSM	Switzerland	51	617	yes	yes
homo/bisexual	male	MSM	Switzerland	53	407	yes	yes
heterosexual	male	HET		41	9	no	no
heterosexual	female	HET		37	549	yes	yes
homo/bisexual	male	MSM	Switzerland	40	725	yes	yes
homo/bisexual	male	MSM		50	712	yes	yes
heterosexual	female	HET	Other	37	917	yes	yes
heterosexual	male	HET	Other	50	398	yes	yes
heterosexual	female	HET	Other	41	382	yes	yes
homo/bisexual	male	MSM	Switzerland	42	527	yes	yes
homo/bisexual	male	MSM	Switzerland	51	402	yes	yes
homo/bisexual	male	MSM	Switzerland	41	602	no	no
homo/bisexual	male	MSM	Switzerland	39	574	yes	yes
homo/bisexual	male	MSM	Switzerland	32	449	no	no
homo/bisexual	male	MSM	Switzerland	44	484	yes	yes
heterosexual	female	HET	Switzerland	47	1242	yes	yes
homo/bisexual	male	MSM	Switzerland	37		no
homo/bisexual	male	MSM	Switzerland	32	323	no	no
homo/bisexual	male	MSM	Switzerland	46	375	yes	yes
homo/bisexual	male	MSM		49	333	no	no
heterosexual	female	HET	Switzerland	31	347	no	no
heterosexual	male	BLOOD	Switzerland	34	729	yes	yes
homo/bisexual	male	MSM		61	884	yes	yes
heterosexual	male	IDU		46	652	no	no
homo/bisexual	male	MSM	Switzerland	51	432	yes	yes
heterosexual	female	HET	Switzerland	47	382	no	yes
heterosexual	male	IDU	Switzerland	47	258	yes	no
homo/bisexual	male	MSM	Switzerland	54		no
heterosexual	male	UNKNOWN		24	568	yes	yes
homo/bisexual	male	UNKNOWN		64	531	yes	yes
homo/bisexual	male	MSM	Switzerland	46	637	yes	yes
heterosexual	male	IDU	Switzerland	47		no
heterosexual	female	HET		32		no
homo/bisexual	male	MSM		35	464	no	no
heterosexual	female	HET	Other	39	747	yes	no
heterosexual	male	IDU	Switzerland	38		no
homo/bisexual	female	HET		26	399	no	no
heterosexual	female	UNKNOWN	Other	49	320	no	no
heterosexual	female	HET	Other	26	833	yes	yes
heterosexual	female	UNKNOWN		37	100	yes	yes
homo/bisexual	male	MSM	Switzerland	51	450	yes	no
heterosexual	male	IDU	Other	50	723	yes	yes
homo/bisexual	male	MSM	Switzerland	46	177	yes	yes
homo/bisexual	male	MSM		28	194	yes	yes
homo/bisexual	male	MSM		40	803	yes	yes
homo/bisexual	male	MSM		40	292	no	no
heterosexual	male	HET	Switzerland	41	371	yes	yes
homo/bisexual	male	UNKNOWN	Switzerland	38	456	yes	yes
homo/bisexual	male	MSM	Switzerland	58	341	yes	yes
heterosexual	male	HET	Switzerland	47	326	yes	no
homo/bisexual	male	MSM	Switzerland	54	666	yes	yes
heterosexual	female	HET	Switzerland	41	363	yes	no
homo/bisexual	male	MSM		47	997	yes	yes
heterosexual	female	HET	Other	44	601	yes	yes
heterosexual	male	HET		47	307	yes	no
homo/bisexual	male	MSM	Switzerland	45		no
homo/bisexual	male	IDU		46	1121	yes	yes

## Sheet: table2
sex_orientation	partner_tot_last_grouped	partnership	casualpartner_condom_anal_pas	casualpartner_condom_anal_ins	casualpartner_condom_vaginal	regularpartner_condom_anal_pas	regularpartner_condom_anal_ins	regularpartner_condom_vaginal
MSM	2-4	casual only	No or not reported	No or not reported	No or not reported
Hetm	1	only regular partner				No or not reported	No or not reported	consistent use
MSM	>5	regular and casual partner	not consistent use	not consistent use	No or not reported	not consistent use	No or not reported	No or not reported
female	1	only regular partner				No or not reported	No or not reported	consistent use
MSM	>5	casual only	No or not reported	not consistent use	No or not reported
female	1	only regular partner				No or not reported	No or not reported	consistent use
Hetm	1	only regular partner				No or not reported	No or not reported	not consistent use
female	1	only regular partner				No or not reported	No or not reported	consistent use
MSM	1	only regular partner				consistent use	consistent use	No or not reported
Hetm	1	only regular partner				No or not reported	No or not reported	not consistent use
Hetm	1	only regular partner				No or not reported	No or not reported	consistent use
Hetm	1	only regular partner				No or not reported	No or not reported	consistent use
female	1	only regular partner				No or not reported	No or not reported	consistent use
MSM	>5	regular and casual partner	No or not reported	No or not reported	No or not reported	No or not reported	No or not reported	No or not reported
MSM	>5	casual only	consistent use	consistent use	No or not reported
female	1	only regular partner				No or not reported	No or not reported	not consistent use
female	>5	casual only	consistent use	No or not reported	consistent use
Hetm	1	only regular partner				No or not reported	No or not reported	consistent use
Hetm	2-4	casual only	No or not reported	No or not reported	No or not reported
MSM	1	casual only	consistent use	consistent use	No or not reported
MSM	2-4	casual only	No or not reported	No or not reported	consistent use
Hetm	1	only regular partner				No or not reported	No or not reported	consistent use
MSM	1	only regular partner				consistent use	No or not reported	No or not reported
Hetm	1	casual only	No or not reported	No or not reported	consistent use
MSM	1	only regular partner				consistent use	No or not reported	No or not reported
MSM	2-4	casual only	consistent use	No or not reported	No or not reported
MSM	1	casual only	consistent use	consistent use	No or not reported
Hetm	1	only regular partner				No or not reported	not consistent use	consistent use
MSM	>5	casual only	No or not reported	No or not reported	No or not reported
MSM	>5	casual only	No or not reported	not consistent use	No or not reported
MSM	1	only regular partner				not consistent use	not consistent use	No or not reported
female	1	only regular partner				No or not reported	No or not reported	consistent use
MSM	1	only regular partner				consistent use	consistent use	No or not reported
Hetm	>5	casual only	No or not reported	No or not reported	consistent use
MSM	1	casual only	consistent use	consistent use	No or not reported
female	2-4	regular and casual partner	No or not reported	No or not reported	not consistent use	No or not reported	No or not reported	No or not reported
Hetm	1	only regular partner				No or not reported	No or not reported	not consistent use
MSM	>5	casual only	not consistent use	not consistent use	No or not reported
Hetm	1	only regular partner				No or not reported	No or not reported	consistent use
female	1	only regular partner				No or not reported	No or not reported	consistent use
MSM	>5	casual only	consistent use	consistent use	No or not reported
MSM	2-4	regular and casual partner	No or not reported	No or not reported	No or not reported	No or not reported	No or not reported	No or not reported
Hetm	1	only regular partner				No or not reported	No or not reported	consistent use
female	1	only regular partner				No or not reported	No or not reported	not consistent use
MSM	>5	casual only	No or not reported	not consistent use	No or not reported
Hetm	1	only regular partner				No or not reported	No or not reported	consistent use
Hetm	1	only regular partner				No or not reported	No or not reported	not consistent use
female	1	only regular partner				No or not reported	No or not reported	not consistent use
MSM	1	only regular partner				consistent use	consistent use	No or not reported
Hetm	1	only regular partner				No or not reported	No or not reported	consistent use
MSM	1	only regular partner				No or not reported	consistent use	No or not reported
MSM	1	only regular partner				not consistent use	No or not reported	No or not reported
female	1	only regular partner				No or not reported	No or not reported	not consistent use
Hetm	1	only regular partner				No or not reported	No or not reported	consistent use
MSM	2-4	regular and casual partner	No or not reported	No or not reported	No or not reported	consistent use	consistent use	No or not reported
female	1	only regular partner				No or not reported	No or not reported	consistent use
MSM	>5	casual only	consistent use	consistent use	No or not reported
MSM	>5	casual only	consistent use	No or not reported	No or not reported
Hetm	1	only regular partner				No or not reported	No or not reported	consistent use
female	1	only regular partner				No or not reported	No or not reported	not consistent use
MSM	>5	casual only	No or not reported	No or not reported	No or not reported
MSM	2-4	casual only	not consistent use	not consistent use	No or not reported
MSM	>5	regular and casual partner	not consistent use	No or not reported	No or not reported	No or not reported	No or not reported	not consistent use
MSM	>5	casual only	not consistent use	not consistent use	No or not reported
MSM	>5	casual only	not consistent use	consistent use	No or not reported
MSM	>5	regular and casual partner	consistent use	consistent use	No or not reported	consistent use	consistent use	No or not reported
female	>5	regular and casual partner	consistent use	No or not reported	No or not reported	consistent use	No or not reported	No or not reported
female	1	only regular partner				No or not reported	No or not reported	consistent use
female	1	only regular partner				No or not reported	No or not reported	not consistent use
Hetm	1	casual only	No or not reported	not consistent use	not consistent use
MSM	1	only regular partner				No or not reported	No or not reported	No or not reported
MSM	2-4	regular and casual partner	consistent use	No or not reported	No or not reported	consistent use	No or not reported	No or not reported
MSM	>5	regular and casual partner	consistent use	not consistent use	No or not reported	not consistent use	No or not reported	No or not reported
MSM	>5	regular and casual partner	not consistent use	not consistent use	No or not reported	not consistent use	not consistent use	No or not reported
MSM	>5	regular and casual partner	consistent use	consistent use	No or not reported	consistent use	consistent use	No or not reported
female	1	only regular partner				No or not reported	No or not reported	consistent use
MSM	>5	casual only	consistent use	consistent use	No or not reported
female	2-4	regular and casual partner	consistent use	No or not reported	No or not reported	No or not reported	No or not reported	No or not reported
MSM	>5	casual only	consistent use	consistent use	No or not reported
MSM	2-4	regular and casual partner	consistent use	No or not reported	No or not reported	consistent use	No or not reported	No or not reported
female	1	only regular partner				No or not reported	No or not reported	not consistent use
Hetm	1	only regular partner				No or not reported	No or not reported	not consistent use
female	1	only regular partner				No or not reported	No or not reported	not consistent use
female	1	only regular partner				No or not reported	No or not reported	consistent use
female	1	only regular partner				No or not reported	No or not reported	not consistent use
MSM	1	only regular partner				No or not reported	No or not reported	No or not reported
Hetm	1	only regular partner				No or not reported	No or not reported	No or not reported
female	1	regular and casual partner	No or not reported	No or not reported	No or not reported	No or not reported	No or not reported	not consistent use
MSM	1	only regular partner				No or not reported	No or not reported	No or not reported
Hetm	1	only regular partner				No or not reported	No or not reported	not consistent use
female	1	only regular partner				No or not reported	No or not reported	consistent use
female	2-4	only regular partner				No or not reported	No or not reported	consistent use
Hetm	1	only regular partner				No or not reported	No or not reported	consistent use
MSM	2-4	casual only	consistent use	No or not reported	No or not reported
female	1	only regular partner				No or not reported	No or not reported	consistent use
Hetm	1	only regular partner				No or not reported	No or not reported	consistent use
Hetm	2-4	casual only	No or not reported	No or not reported	consistent use
female	1	only regular partner				No or not reported	No or not reported	not consistent use
Hetm	1	only regular partner				No or not reported	No or not reported	consistent use
MSM	>5	casual only	consistent use	consistent use	No or not reported
female	1	only regular partner				No or not reported	No or not reported	consistent use
female	1	only regular partner				No or not reported	No or not reported	No or not reported
Hetm	1	only regular partner				No or not reported	No or not reported	not consistent use
female	1	only regular partner				No or not reported	No or not reported	consistent use
MSM	>5	casual only	consistent use	consistent use	No or not reported
MSM	>5	regular and casual partner	not consistent use	not consistent use	No or not reported	consistent use	consistent use	No or not reported
MSM	>5	casual only	not consistent use	not consistent use	No or not reported
MSM	2-4	regular and casual partner	consistent use	consistent use	No or not reported	consistent use	consistent use	No or not reported
MSM	>5	regular and casual partner	No or not reported	not consistent use	No or not reported	No or not reported	not consistent use	No or not reported
female	1	only regular partner				No or not reported	No or not reported	not consistent use
female	1	only regular partner				No or not reported	No or not reported	consistent use
MSM	>5	regular and casual partner	consistent use	consistent use	No or not reported	No or not reported	No or not reported	consistent use
Hetm	2-4	casual only	No or not reported	No or not reported	consistent use
MSM	>5	casual only	consistent use	consistent use	No or not reported
Hetm	1	only regular partner				No or not reported	No or not reported	consistent use
MSM	2-4	regular and casual partner	consistent use	consistent use	No or not reported	consistent use	consistent use	No or not reported
MSM	1	only regular partner				No or not reported	No or not reported	No or not reported
MSM	>5	regular and casual partner	No or not reported	No or not reported	consistent use	consistent use	No or not reported	consistent use
Hetm	2-4	regular and casual partner	No or not reported	No or not reported	consistent use	No or not reported	No or not reported	consistent use
MSM	>5	regular and casual partner	consistent use	consistent use	No or not reported	not consistent use	not consistent use	No or not reported
MSM	2-4	only regular partner				consistent use	No or not reported	No or not reported
MSM	>5	only regular partner				consistent use	consistent use	No or not reported
Hetm	>5	regular and casual partner	No or not reported	No or not reported	consistent use	No or not reported	No or not reported	consistent use
Hetm	>5	casual only	No or not reported	No or not reported	consistent use
MSM	1	only regular partner				not consistent use	not consistent use	No or not reported
MSM	1	only regular partner				consistent use	consistent use	No or not reported
MSM	>5	regular and casual partner	consistent use	consistent use	No or not reported	consistent use	consistent use	No or not reported
Hetm	1	only regular partner				No or not reported	No or not reported	not consistent use
female	1	only regular partner				No or not reported	No or not reported	consistent use
MSM	2-4	regular and casual partner	consistent use	consistent use	No or not reported	consistent use	consistent use	No or not reported
MSM	>5	regular and casual partner	consistent use	consistent use	No or not reported	consistent use	consistent use	No or not reported
Hetm	1	only regular partner				No or not reported	No or not reported	consistent use
MSM	>5	casual only	consistent use	consistent use	No or not reported
female	1	only regular partner				No or not reported	No or not reported	not consistent use
MSM	>5	casual only	consistent use	consistent use	No or not reported
MSM	1	only regular partner				No or not reported	consistent use	No or not reported
Hetm	1	only regular partner				No or not reported	No or not reported	consistent use
Hetm	2-4	casual only	No or not reported	No or not reported	consistent use
MSM	1	only regular partner				not consistent use	not consistent use	No or not reported
female	1	only regular partner				No or not reported	No or not reported	consistent use
Hetm	1	only regular partner				No or not reported	No or not reported	consistent use
Hetm	2-4	casual only	No or not reported	consistent use	consistent use
MSM	>5	casual only	not consistent use	not consistent use	No or not reported
MSM	1	only regular partner				consistent use	consistent use	No or not reported
Hetm	1	only regular partner				No or not reported	No or not reported	consistent use
MSM	>5	casual only	not consistent use	not consistent use	No or not reported
Hetm	1	casual only	No or not reported	No or not reported	consistent use
female	1	only regular partner				No or not reported	No or not reported	consistent use
MSM	1	only regular partner				consistent use	No or not reported	No or not reported
MSM	1	only regular partner				No or not reported	No or not reported	No or not reported
MSM	1	only regular partner				not consistent use	No or not reported	No or not reported
Hetm	1	only regular partner				No or not reported	No or not reported	consistent use
female	1	only regular partner				No or not reported	No or not reported	consistent use
MSM	>5	regular and casual partner	consistent use	consistent use	No or not reported	consistent use	No or not reported	No or not reported
Hetm	2-4	casual only	No or not reported	No or not reported	consistent use
MSM	>5	casual only	consistent use	No or not reported	No or not reported
MSM	1	only regular partner				consistent use	consistent use	No or not reported
MSM	>5	casual only	consistent use	consistent use	No or not reported
MSM	2-4	regular and casual partner	consistent use	No or not reported	No or not reported	consistent use	No or not reported	No or not reported
MSM	2-4	regular and casual partner	consistent use	consistent use	No or not reported	not consistent use	No or not reported	No or not reported
female	1	only regular partner				No or not reported	No or not reported	not consistent use
MSM	>5	casual only	No or not reported	No or not reported	No or not reported
Hetm	1	only regular partner				No or not reported	No or not reported	consistent use
female	1	only regular partner				No or not reported	No or not reported	consistent use
Hetm	1	only regular partner				No or not reported	No or not reported	not consistent use
MSM	1	only regular partner				not consistent use	No or not reported	No or not reported
MSM	>5	regular and casual partner	consistent use	No or not reported	No or not reported	consistent use	consistent use	No or not reported
Hetm	1	only regular partner				No or not reported	No or not reported	not consistent use
MSM	1	only regular partner				consistent use	consistent use	No or not reported
female	1	casual only	No or not reported	No or not reported	consistent use
MSM	1	only regular partner				consistent use	consistent use	No or not reported
Hetm	1	only regular partner				No or not reported	No or not reported	consistent use
Hetm	1	only regular partner				No or not reported	No or not reported	not consistent use
Hetm	1	only regular partner				No or not reported	No or not reported	consistent use
MSM	>5	regular and casual partner	consistent use	consistent use	consistent use	consistent use	consistent use	consistent use
MSM	2-4	regular and casual partner	consistent use	consistent use	No or not reported	consistent use	consistent use	No or not reported
MSM	2-4	only regular partner				No or not reported	No or not reported	No or not reported
Hetm	2-4	casual only	No or not reported	No or not reported	consistent use
MSM	2-4	casual only	consistent use	No or not reported	No or not reported
female	1	only regular partner				No or not reported	No or not reported	consistent use
MSM	>5	casual only	consistent use	consistent use	No or not reported
female	1	only regular partner				No or not reported	No or not reported	not consistent use
MSM	>5	casual only	No or not reported	consistent use	No or not reported
Hetm	1	only regular partner				No or not reported	No or not reported	consistent use
MSM	>5	casual only	not consistent use	not consistent use	No or not reported
MSM	1	only regular partner				consistent use	consistent use	No or not reported
MSM	1	only regular partner				No or not reported	No or not reported	No or not reported
MSM	1	only regular partner				not consistent use	consistent use	No or not reported
Hetm	2-4	casual only	No or not reported	No or not reported	not consistent use
Hetm	2-4	regular and casual partner	No or not reported	No or not reported	consistent use	No or not reported	No or not reported	consistent use
Hetm	1	only regular partner				No or not reported	No or not reported	not consistent use
female	1	only regular partner				No or not reported	No or not reported	not consistent use
Hetm	1	only regular partner				No or not reported	No or not reported	consistent use
MSM	>5	regular and casual partner	consistent use	No or not reported	No or not reported	consistent use	No or not reported	No or not reported
Hetm	1	only regular partner				No or not reported	No or not reported	consistent use
MSM	>5	regular and casual partner	consistent use	consistent use	No or not reported	consistent use	consistent use	No or not reported
MSM	1	only regular partner				consistent use	consistent use	No or not reported
MSM	1	only regular partner				not consistent use	not consistent use	No or not reported
MSM	>5	regular and casual partner	No or not reported	consistent use	No or not reported	No or not reported	No or not reported	No or not reported
MSM	1	only regular partner				consistent use	consistent use	No or not reported
MSM	1	only regular partner				consistent use	consistent use	No or not reported
Hetm	1	only regular partner				No or not reported	No or not reported	not consistent use
MSM	>5	casual only	consistent use	consistent use	No or not reported
MSM	>5	casual only	consistent use	consistent use	No or not reported
female	1	only regular partner				No or not reported	No or not reported	not consistent use
MSM	2-4	casual only	consistent use	consistent use	No or not reported
Hetm	1	only regular partner				No or not reported	No or not reported	not consistent use
Hetm	1	only regular partner				No or not reported	No or not reported	consistent use
MSM	>5	regular and casual partner	consistent use	consistent use	consistent use	No or not reported	consistent use	No or not reported
Hetm	1	only regular partner				No or not reported	No or not reported	consistent use
female	1	only regular partner				No or not reported	No or not reported	consistent use
Hetm	2-4	only regular partner				No or not reported	No or not reported	consistent use
Hetm	1	only regular partner				No or not reported	No or not reported	consistent use
MSM	2-4	regular and casual partner	consistent use	No or not reported	No or not reported	not consistent use	not consistent use	No or not reported
MSM	>5	regular and casual partner	No or not reported	consistent use	No or not reported	No or not reported	No or not reported	No or not reported
MSM	>5	casual only	not consistent use	No or not reported	No or not reported
MSM	2-4	casual only	No or not reported	not consistent use	No or not reported
MSM	2-4	regular and casual partner	consistent use	No or not reported	No or not reported	consistent use	consistent use	No or not reported
Hetm	1	only regular partner				No or not reported	No or not reported	consistent use
MSM	>5	casual only	not consistent use	not consistent use	No or not reported
Hetm	1	only regular partner				No or not reported	No or not reported	consistent use
MSM	2-4	casual only	No or not reported	No or not reported	No or not reported
female	1	only regular partner				No or not reported	No or not reported	consistent use
Hetm	1	casual only	No or not reported	No or not reported	consistent use

## Sheet: table3
sex_orientation	current_chlam_lgv_combined	current_gonorrhoea	has_current_syph	sc_syphilis_09	hsv2	hcv_antibodypos_bef2009	hb_status
MSM	no	no	no	no	no	no	HBV unknown
MSM	no	no	yes	no	no	no	HBV uninfected not immune
female	no	no	no	no	yes	yes	hbc_positive sAg neg eAg neg
Hetm	no	no	no	no	no	no	HBV uninfected not immune
MSM	no	no	no	no	no	no	hbs_positive hbc_negative
MSM	no	no	no	no	no	no	hbc_positive sAg neg eAg neg
MSM	no	no	yes	no	no	no	hbc_positive sAg neg eAg neg
female	no	no	no	no	yes	no	hbc_positive sAg neg eAg neg
female	no	no	no	no	no	no	hbs_positive hbc_negative
MSM	no	no	no	no	no	no	HBV uninfected not immune
Hetm	no	no	no	no	no	yes	hbc_positive sAg neg eAg neg
Hetm	no	no	no	no	no	yes	hbc_positive sAg neg eAg neg
female	no	no	no	no	no	yes	hbs_positive hbc_negative
MSM	no	no	yes	yes	yes	no	hbc_positive sAg neg eAg neg
MSM	no	no	yes	no	no	no	hbc_positive sAg neg eAg neg
female	no	no	no	no	no	no	hbs_positive hbc_negative
female	no	no	no	no	yes	no	hbs_positive hbc_negative
Hetm	no	no	no	no	no	yes	hbc_positive sAg neg eAg neg
MSM	no	no	no	no	yes	no	hbc_positive sAg neg eAg neg
MSM	no	no	no	no	yes	no	hbs_positive hbc_negative
MSM	no	no	no	no	yes	no	hbc_positive sAg neg eAg neg
MSM	yes	no	yes	no	no	no	hbc_positive sAg neg eAg neg
MSM	no	no	yes	no	yes	no	hbc_positive sAg neg eAg neg
Hetm	no	no	no	no	yes	no	hbs_positive hbc_negative
female	no	no	no	no	yes	yes	hbc_positive sAg neg eAg neg
female	no	no	no	no	no	no	HBV uninfected not immune
MSM	no	no	no	no	yes	no	hbs_positive hbc_negative
Hetm	no	no	no	no	yes	no	HBV uninfected not immune
MSM	no	no	no	no	no	no	hbs_positive hbc_negative
female	no	no	no	no	no	no	hbs_positive hbc_negative
MSM	no	yes	no	no	no	no	HBV unknown
Hetm	no	no	no	no	no	yes	hbc_positive sAg neg eAg neg
MSM	no	no	no	no	yes	no	hbc_positive sAg neg eAg neg
MSM	yes	no	no	no	yes	no	hbc_positive sAg neg eAg neg
MSM	no	no	yes	no	no	yes	hbc_positive sAg neg eAg neg
MSM	yes	no	no	no	yes	no	HBV uninfected not immune
Hetm	no	no	no	no	no	no	hbs_positive hbc_negative
MSM	no	no	no	no	no	no	hbc_positive sAg neg eAg neg
MSM	no	no	yes	yes	yes	no	hbs_positive hbc_negative
female	no	no	no	no	yes	no	hbs_positive hbc_negative
MSM	no	no	no	no	no	yes	hbc_positive sAg neg eAg neg
Hetm	no	no	no	no	no	no	HBV uninfected not immune
Hetm	no	no	no	no	no	no	HBV uninfected not immune
Hetm	no	no	no	no	yes	no	hbc_positive sAg neg eAg neg
female	no	no	no	no	no	yes	hbc_positive sAg neg eAg neg
Hetm	no	no	no	no	yes	no	hbc_positive sAg neg eAg neg
Hetm	no	no	no	no	yes	no	hbs_positive hbc_negative
female	no	no	no	no	no	yes	hbc_positive sAg neg eAg neg
MSM	no	no	no	no	yes	no	hbc_positive sAg neg eAg neg
Hetm	no	no	no	no	no	no	HBV uninfected not immune
Hetm	no	no	no	no	yes	no	HB sAg pos eAg pos
Hetm	no	no	no	no	no	no	HBV unknown
female	no	no	no	no	yes	no	hbs_positive hbc_negative
female	no	no	no	no	no	no	HBV uninfected not immune
MSM	no	no	no	no	no	no	HBV uninfected not immune
Hetm	no	yes	no	no	no	no	HBV uninfected not immune
female	no	no	no	no	no	no	HBV uninfected not immune
MSM	no	no	no	no	no	no	hbs_positive hbc_negative
Hetm	no	no	no	no	yes	no	hbs_positive hbc_negative
MSM	no	no	yes	no	no	no	HBV uninfected not immune
MSM	no	no	no	no	no	no	HBV uninfected not immune
Hetm	no	no	no	no	no	yes	HBV uninfected not immune
MSM	yes	no	yes	no	no	no	hbs_positive hbc_negative
MSM	no	no	no	no	yes	no	HBV uninfected not immune
MSM	no	no	yes	no	yes	yes	hbc_positive sAg neg eAg neg
female	no	no	yes	no	yes	no	hbc_positive sAg neg eAg neg
female	no	no	no	no	yes	no	HBV uninfected not immune
Hetm	no	no	no	no	no	no	HBV uninfected not immune
MSM	no	no	no	no	yes	no	HBV unknown
Hetm	no	no	no	no	yes	no	HBV uninfected not immune
MSM	no	no	no	no	no	yes	hbc_positive sAg neg eAg neg
Hetm	no	no	no	no	no	no	hbc_positive sAg neg eAg neg
MSM	no	no	no	no	no	no	HBV uninfected not immune
MSM	no	no	no	no	no	no	HBV unknown
Hetm	no	no	no	no	yes	no	HBV unknown
Hetm	no	no	no	no	yes	no	hbc_positive sAg neg eAg neg
MSM	no	no	no	no	no	no	hbc_positive sAg neg eAg neg
MSM	no	no	no	no	no	no	hbs_positive hbc_negative
MSM	no	no	no	no	no	no	HBV uninfected not immune
MSM	no	no	no	no	yes	no	hbc_positive sAg neg eAg neg
MSM	no	no	no	no	no	no	HBV uninfected not immune
female	no	no	no	no	no	no	HBV uninfected not immune
MSM	no	no	yes	no	yes	no	hbc_positive sAg neg eAg neg
MSM	yes	no	yes	no	yes	no	hbc_positive sAg neg eAg neg
MSM	no	no	no	no	no	no	HBV uninfected not immune
Hetm	no	no	no	no	no	no	hbc_positive sAg neg eAg neg
MSM	no	no	no	no	yes	no	hbc_positive sAg neg eAg neg
Hetm	no	no	no	no	no	yes	HB sAg pos eAg pos
MSM	no	no	no	no	yes	no	hbc_positive sAg neg eAg neg
MSM	no	no	no	no	yes	no	hbc_positive sAg neg eAg neg
MSM	no	no	no	no	yes	no	HBV uninfected not immune
MSM	no	no	no	no	no	no	HBV uninfected not immune
female	no	no	no	no	yes	no	hbc_positive sAg neg eAg neg
MSM	no	no	yes	no	no	no	HBV unknown
MSM	no	no	no	no	no	no	hbc_positive sAg neg eAg neg
Hetm	no	no	no	no	no	no	hbs_positive hbc_negative
female	no	no	no	no	yes	no	HBV uninfected not immune
MSM	no	no	yes	yes	no	no	hbs_positive hbc_negative
Hetm	no	no	no	no	no	no	hbs_positive hbc_negative
MSM	no	no	no	no	yes	no	hbs_positive hbc_negative
Hetm	no	no	no	no	no	no	HBV uninfected not immune
MSM	yes	yes	no	no	yes	no	hbc_positive sAg neg eAg neg
MSM	no	no	no	no	no	no	hbs_positive hbc_negative
female	no	no	yes	no	yes	no	hbc_positive sAg neg eAg neg
MSM	no	no	yes	no	yes	no	hbc_positive sAg neg eAg neg
Hetm	no	no	no	no	no	yes	hbc_positive sAg neg eAg neg
Hetm	no	no	no	no	no	yes	HBV uninfected not immune
MSM	no	no	no	no	no	no	hbc_positive sAg neg eAg neg
Hetm	no	no	no	no	yes	no	HBV uninfected not immune
MSM	no	no	yes	no	yes	no	hbc_positive sAg neg eAg neg
MSM	no	no	yes	no	yes	no	hbs_positive hbc_negative
MSM	no	no	no	no	yes	no	hbs_positive hbc_negative
MSM	no	no	yes	no	no	no	hbc_positive sAg neg eAg neg
Hetm	no	no	no	no	no	no	HBV uninfected not immune
MSM	no	no	no	no	no	no	hbs_positive hbc_negative
Hetm	no	no	no	no	no	yes	hbs_positive hbc_negative
Hetm	no	no	yes	no	no	no	HBV uninfected not immune
Hetm	no	no	no	no	no	no	HBV uninfected not immune
female	no	no	no	no	yes	no	HBV uninfected not immune
Hetm	no	no	no	no	no	no	hbc_positive sAg neg eAg neg
MSM	no	no	no	no	yes	no	HBV uninfected not immune
Hetm	no	no	no	no	yes	no	HBV uninfected not immune
MSM	no	yes	yes	no	yes	no	hbc_positive sAg neg eAg neg
MSM	no	no	no	no	no	no	hbs_positive hbc_negative
MSM	no	no	yes	no	yes	no	HBV unknown
Hetm	no	no	no	no	yes	no	hbs_positive hbc_negative
female	no	no	no	no	no	no	HBV uninfected not immune
female	no	no	no	no	no	yes	hbc_positive sAg neg eAg neg
MSM	no	no	no	no	yes	no	HBV uninfected not immune
MSM	no	no	yes	no	no	no	hbs_positive hbc_negative
female	no	no	no	no	yes	no	hbc_positive sAg neg eAg neg
Hetm	no	no	no	no	no	no	hbc_positive sAg neg eAg neg
MSM	no	no	no	no	yes	no	hbc_positive sAg neg eAg neg
MSM	no	no	no	no	no	no	HBV uninfected not immune
MSM	no	no	yes	no	yes	yes	hbc_positive sAg neg eAg neg
female	no	no	no	no	yes	no	HBV uninfected not immune
MSM	no	no	no	no	no	no	HBV unknown
Hetm	no	no	no	no	yes	no	hbc_positive sAg neg eAg neg
MSM	no	no	no	no	no	no	HBV uninfected not immune
female	no	no	no	no	yes	no	hbc_positive sAg neg eAg neg
Hetm	no	no	no	no	no	yes	HBV uninfected not immune
MSM	no	no	no	no	no	no	HBV unknown
MSM	no	no	yes	no	yes	no	hbc_positive sAg neg eAg neg
Hetm	no	no	no	no	no	yes	HBV uninfected not immune
female	no	no	no	no	yes	no	HBV uninfected not immune
MSM	no	no	no	no	no	no	hbs_positive hbc_negative
Hetm	no	no	no	no	no	yes	HB sAg pos eAg pos
Hetm	no	no	no	no	no	yes	HB sAg pos eAg pos
MSM	no	no	yes	no	no	no	hbs_positive hbc_negative
MSM	no	no	no	no	yes	no	hbc_positive sAg neg eAg neg
Hetm	no	no	no	no	yes	no	hbs_positive hbc_negative
female	no	no	no	no	no	yes	hbc_positive sAg neg eAg neg
female	no	no	no	no	yes	yes	hbc_positive sAg neg eAg neg
MSM	no	no	no	no	no	no	hbs_positive hbc_negative
female	no	no	yes	no	yes	yes	hbs_positive hbc_negative
MSM	no	no	yes	no	yes	no	hbc_positive sAg neg eAg neg
MSM	no	no	no	no	yes	no	HB sAg pos eAg pos
Hetm	no	no	no	no	yes	no	hbs_positive hbc_negative
MSM	no	no	yes	yes	no	no	hbc_positive sAg neg eAg neg
Hetm	no	no	no	no	yes	yes	hbc_positive sAg neg eAg neg
MSM	no	no	yes	yes	yes	no	hbc_positive sAg neg eAg neg
Hetm	no	no	no	no	no	no	HBV uninfected not immune
MSM	no	no	no	no	no	no	HBV uninfected not immune
female	no	no	no	no	yes	no	hbc_positive sAg neg eAg neg
Hetm	no	no	no	no	no	yes	hbs_positive hbc_negative
Hetm	no	no	no	no	no	yes	hbc_positive sAg neg eAg neg
MSM	no	no	yes	no	yes	no	HB sAg pos eAg pos
female	no	no	no	no	no	no	hbs_positive hbc_negative
Hetm	no	no	no	no	yes	no	hbs_positive hbc_negative
female	no	no	no	no	yes	yes	hbc_positive sAg neg eAg neg
MSM	no	no	no	no	no	no	HBV uninfected not immune
Hetm	no	no	no	no	no	no	HB sAg pos eAg pos
MSM	no	no	yes	no	yes	no	hbs_positive hbc_negative
MSM	yes	no	yes	no	yes	no	HBV unknown
Hetm	no	no	no	no	yes	no	HBV uninfected not immune
MSM	no	no	no	no	no	no	hbs_positive hbc_negative
MSM	yes	no	no	no	yes	no	hbs_positive hbc_negative
MSM	no	no	no	no	yes	no	HBV uninfected not immune
female	no	no	no	no	no	no	HB sAg pos eAg pos
MSM	no	no	no	no	no	no	HBV uninfected not immune
MSM	no	no	no	no	no	no	hbc_positive sAg neg eAg neg
female	no	no	no	no	yes	no	hbs_positive hbc_negative
female	no	no	no	no	no	no	hbc_positive sAg neg eAg neg
MSM	no	no	yes	no	yes	no	hbc_positive sAg neg eAg neg
female	no	no	no	no	yes	no	HB sAg pos eAg pos
MSM	no	no	no	no	yes	no	HBV uninfected not immune
MSM	no	no	yes	no	yes	no	hbs_positive hbc_negative
MSM	yes	no	no	no	yes	no	hbc_positive sAg neg eAg neg
Hetm	no	no	no	no	no	yes	HB sAg pos eAg pos
MSM	no	no	yes	no	yes	no	hbs_positive hbc_negative
MSM	no	no	yes	no	yes	yes	hbc_positive sAg neg eAg neg
female	no	no	no	no	no	no	hbs_positive hbc_negative
Hetm	no	no	no	no	no	no	hbs_positive hbc_negative
female	no	no	no	no	yes	no	hbc_positive sAg neg eAg neg
female	no	no	no	no	yes	no	hbc_positive sAg neg eAg neg
MSM	no	no	yes	no	yes	no	HBV uninfected not immune
Hetm	no	no	no	no	no	no	hbs_positive hbc_negative
MSM	no	no	no	no	yes	no	hbs_positive hbc_negative
Hetm	no	no	no	no	yes	no	hbc_positive sAg neg eAg neg
MSM	yes	no	no	no	no	no	HBV uninfected not immune
MSM	no	no	no	no	no	yes	hbc_positive sAg neg eAg neg
Hetm	no	no	no	no	yes	yes	hbs_positive hbc_negative
MSM	no	no	no	no	yes	no	hbc_positive sAg neg eAg neg
female	no	no	no	no	yes	no	hbs_positive hbc_negative
Hetm	no	no	no	no	no	yes	HBV uninfected not immune
Hetm	no	no	no	no	yes	no	hbc_positive sAg neg eAg neg
MSM	no	no	yes	no	yes	no	hbc_positive sAg neg eAg neg
MSM	no	no	yes	yes	yes	no	hbs_positive hbc_negative
Hetm	no	no	no	no	no	no	HBV uninfected not immune
MSM	no	no	no	no	yes	no	hbc_positive sAg neg eAg neg
Hetm	no	no	no	no	no	yes	hbc_positive sAg neg eAg neg
Hetm	no	no	no	no	no	yes	hbc_positive sAg neg eAg neg
MSM	yes	no	no	no	no	no	HBV uninfected not immune
MSM	no	no	yes	no	no	no	hbc_positive sAg neg eAg neg
female	no	no	no	no	no	no	hbc_positive sAg neg eAg neg
female	no	no	no	no	yes	no	hbc_positive sAg neg eAg neg
MSM	no	no	no	no	no	no	HBV uninfected not immune
MSM	no	no	no	no	yes	no	HBV uninfected not immune
Hetm	no	no	no	no	yes	no	HBV uninfected not immune
MSM	no	no	no	no	yes	no	HBV uninfected not immune
MSM	yes	no	no	no	yes	no	hbs_positive hbc_negative
female	no	no	yes	no	yes	no	HBV unknown
female	no	no	yes	no	yes	no	hbs_positive hbc_negative
female	no	no	no	no	no	no	hbc_positive sAg neg eAg neg

## Sheet: table4
sex_orientation	total_ct_lgv	total_gonorrhoe	total_syphilis	total_bactSTI
female	yes	no	no	yes
MSM	no	no	no	no
female	no	no	no	no
Hetm	no	no	no	no
MSM	yes	no	no	yes
MSM	no	no	no	no
MSM	no	no	no	no
MSM	no	no	no	no
Hetm	no	no	no	no
MSM	yes	no	no	yes
Hetm	no	no	no	no
MSM	yes	no	no	yes
MSM	no	no	no	no
MSM	yes	yes	yes	yes
MSM	no	no	no	no
MSM	no	no	no	no
MSM	no	no	no	no
Hetm	no	no	no	no
MSM	no	no	no	no
MSM	no	no	no	no
female	no	no	no	no
Hetm	no	no	no	no
female	no	no	no	no
MSM	no	no	no	no
Hetm	no	no	no	no
Hetm	no	no	no	no
MSM	no	no	no	no
MSM	no	no	no	no
Hetm	no	no	no	no
female	no	no	no	no
Hetm	no	no	no	no
female	no	no	no	no
Hetm	no	no	no	no
Hetm	no	no	no	no
Hetm	no	no	no	no
Hetm	no	no	no	no
female	no	no	no	no
MSM	no	no	no	no
Hetm	no	no	no	no
Hetm	no	no	no	no
MSM	no	no	no	no
female	no	no	no	no
MSM	yes	yes	no	yes
female	no	no	no	no
MSM	yes	no	no	yes
MSM	yes	no	no	yes
MSM	no	no	yes	yes
Hetm	no	no	no	no
MSM	yes	no	yes	yes
MSM	yes	yes	yes	yes
Hetm	no	no	no	no
MSM	no	no	no	no
female	no	no	no	no
MSM	no	no	no	no
MSM	no	no	no	no
female	no	no	no	no
Hetm	no	no	no	no
female	no	no	no	no
MSM	no	no	no	no
MSM	no	no	no	no
MSM	no	no	no	no
female	no	no	no	no
MSM	no	no	no	no
Hetm	no	no	no	no
MSM	no	no	no	no
MSM	no	no	no	no
Hetm	no	no	no	no
MSM	no	no	no	no
MSM	no	no	no	no
MSM	no	no	no	no
Hetm	no	no	no	no
MSM	yes	no	no	yes
MSM	no	no	no	no
MSM	yes	no	yes	yes
female	no	no	no	no
MSM	no	no	no	no
MSM	no	no	no	no
MSM	no	no	no	no
Hetm	no	no	no	no
MSM	no	no	no	no
Hetm	no	no	no	no
MSM	no	no	no	no
Hetm	no	no	no	no
female	no	no	no	no
Hetm	no	no	no	no
Hetm	no	no	no	no
female	no	no	no	no
MSM	yes	no	no	yes
female	no	no	no	no
Hetm	no	no	no	no
MSM	no	no	yes	yes
MSM	no	no	no	no
Hetm	no	no	no	no
Hetm	no	no	no	no
Hetm	no	no	no	no
Hetm	no	no	no	no
female	no	no	no	no
MSM	no	no	no	no
Hetm	no	no	no	no
MSM	no	no	no	no
MSM	no	no	no	no
MSM	no	no	no	no
Hetm	no	no	no	no
MSM	no	no	no	no
female	no	no	no	no
MSM	no	no	yes	yes
female	no	no	no	no
female	no	no	no	no
female	no	no	no	no
MSM	no	no	yes	yes
MSM	yes	no	no	yes
MSM	no	no	yes	yes
female	no	no	no	no
MSM	no	no	no	no
MSM	no	no	yes	yes
MSM	no	no	yes	yes
MSM	no	no	no	no
Hetm	no	no	no	no
MSM	no	no	no	no
Hetm	no	no	no	no
MSM	no	no	no	no
MSM	no	no	no	no
MSM	no	no	yes	yes
female	no	no	no	no
Hetm	no	no	no	no
Hetm	no	no	no	no
MSM	no	no	no	no
Hetm	no	no	no	no
Hetm	no	no	no	no
female	no	no	no	no
Hetm	no	no	no	no
Hetm	no	no	no	no
MSM	no	no	no	no
Hetm	no	no	no	no
female	no	no	no	no
female	no	no	yes	yes
MSM	no	no	no	no
female	no	no	no	no
female	no	no	no	no
Hetm	no	no	no	no
Hetm	no	no	no	no
Hetm	no	no	no	no
MSM	no	yes	no	yes
MSM	no	no	no	no
Hetm	no	no	no	no
female	no	no	no	no
MSM	yes	no	no	yes
MSM	no	no	no	no
Hetm	no	no	no	no
Hetm	no	no	no	no
MSM	no	no	yes	yes
MSM	no	no	no	no
Hetm	no	no	no	no
MSM	yes	no	yes	yes
MSM	no	no	no	no
Hetm	no	no	no	no
MSM	no	no	no	no
MSM	no	no	no	no
MSM	no	no	no	no
MSM	no	no	no	no
female	no	no	no	no
Hetm	no	no	no	no
female	no	no	no	no
Hetm	no	no	no	no
Hetm	no	no	no	no
MSM	no	no	no	no
MSM	no	no	no	no
Hetm	no	no	no	no
female	no	no	no	no
MSM	no	no	no	no
MSM	no	no	no	no
Hetm	no	no	no	no
female	no	no	no	no
MSM	no	no	no	no
MSM	no	no	no	no
MSM	no	yes	no	yes
Hetm	no	no	no	no
MSM	no	no	no	no
Hetm	no	no	no	no
MSM	no	no	no	no
female	no	no	no	no
MSM	no	no	no	no
MSM	no	no	no	no
MSM	no	no	no	no
MSM	yes	no	no	yes
female	no	no	no	no
female	no	no	no	no
MSM	no	no	no	no
Hetm	no	no	no	no
MSM	no	no	no	no
MSM	yes	no	no	yes
Hetm	no	no	no	no
MSM	no	no	yes	yes
MSM	no	no	no	no
MSM	no	no	yes	yes
Hetm	no	no	no	no
MSM	no	no	no	no
MSM	no	no	no	no
MSM	no	no	no	no
MSM	no	no	no	no
female	yes	no	no	yes
female	no	no	no	no
MSM	no	no	no	no
female	no	no	no	no
female	no	no	no	no
Hetm	no	no	no	no
female	no	no	no	no
MSM	no	no	no	no
female	no	no	no	no
Hetm	no	yes	no	yes
MSM	no	no	no	no
Hetm	no	no	no	no
MSM	no	no	no	no
Hetm	no	no	no	no
MSM	no	no	no	no
female	no	no	no	no
MSM	no	no	no	no
MSM	no	no	no	no
MSM	no	no	no	no
female	no	no	no	no
female	no	no	no	no
female	no	no	no	no
MSM	yes	no	no	yes
Hetm	no	no	no	no

## Sheet: table5
sex_orientation	tested_results	where_test_done	talk_sexualhealth	routine_test
MSM	not tested	Not tested or not known	yes	No
MSM	tested, negative for all	General practitioner	no	Yes, regularly
MSM	tested , positive for any	HIV outpatient clinic	yes	Yes, regularly
MSM	tested, negative for all	HIV outpatient clinic	yes	Yes, regularly
Hetm	tested , positive for any	HIV outpatient clinic	yes	Yes, if at risk
Hetm	tested, negative for all	HIV outpatient clinic	no	Yes, regularly
Hetm	tested, negative for all	HIV outpatient clinic	yes	Yes, regularly
MSM	tested, negative for all	HIV outpatient clinic	no	Yes, regularly
MSM	unknown	Not tested or not known
female	not tested	Not tested or not known	no	No
female	tested, negative for all	HIV outpatient clinic	yes	Yes, regularly
female	not tested	Not tested or not known	no	Yes, if at risk
MSM	not tested	Not tested or not known	yes	Yes, if symptoms present
MSM	tested, negative for all	HIV outpatient clinic	yes	Yes, regularly
MSM	tested, negative for all	HIV outpatient clinic	yes	Yes, regularly
MSM	not tested	Not tested or not known	no	Yes, regularly
MSM	tested, negative for all	General practitioner	no	Yes, regularly
Hetm	not tested	Not tested or not known	no	No
Hetm	tested, negative for all	HIV outpatient clinic	yes	Yes, regularly
MSM	tested, negative for all	Gynaecologist	yes	No
Hetm	not tested	Not tested or not known	yes	Yes, regularly
MSM	not tested	Not tested or not known	yes	Yes, if symptoms present
female	unknown	Not tested or not known	no	No
MSM	not tested	Not tested or not known	yes	Yes, if symptoms present
female	tested, negative for all	Gynaecologist	no	Yes, regularly
MSM	not tested	Not tested or not known	yes	Yes, regularly
MSM	not tested	Not tested or not known		Yes, regularly
MSM	not tested	Not tested or not known		Yes, if at risk
MSM	not tested	Not tested or not known	yes	Yes, if symptoms present
Hetm	not tested	Not tested or not known	no	Yes, regularly
female	not tested	Not tested or not known	yes	Yes, regularly
female	tested , positive for any	HIV outpatient clinic	yes	Yes, if at risk
MSM	not tested	Not tested or not known		No
female	unknown	Not tested or not known	no	Yes, regularly
MSM	tested, negative for all	HIV outpatient clinic	yes	Yes, regularly
MSM	tested , positive for any	HIV outpatient clinic	yes	Yes, regularly
Hetm	not tested	Not tested or not known	no	Yes, if at risk
Hetm	not tested	Not tested or not known	yes	No
MSM	tested , positive for any	HIV outpatient clinic	yes	Yes, if symptoms present
MSM	unknown	Not tested or not known	yes	Yes, regularly
Hetm	not tested	Not tested or not known	no	Yes, if at risk
MSM	not tested	Not tested or not known	yes	Yes, regularly
MSM	unknown	Not tested or not known	yes	Yes, regularly
MSM	tested, negative for all	HIV outpatient clinic	yes	Yes, regularly
Hetm	not tested	Not tested or not known	yes	No
MSM	not tested	Not tested or not known	yes	Yes, if symptoms present
female	not tested	Not tested or not known	yes	Yes, if at risk
Hetm	tested , positive for any	HIV outpatient clinic	yes	No
MSM	not tested	Not tested or not known	yes	Yes, regularly
MSM	tested , positive for any	HIV outpatient clinic	no	Yes, regularly
MSM	tested, negative for all	HIV outpatient clinic	no	Yes, if symptoms present
MSM	not tested	Not tested or not known	yes	Yes, regularly
Hetm	unknown	Not tested or not known	yes	Yes, regularly
MSM	tested , positive for any	HIV outpatient clinic	yes	Yes, regularly
MSM	not tested	Not tested or not known	yes	Yes, if symptoms present
female	not tested	Not tested or not known	yes	Yes, if at risk
Hetm	not tested	Not tested or not known	yes	Yes, if symptoms present
MSM	tested , positive for any	HIV outpatient clinic	yes	Yes, regularly
Hetm	not tested	Not tested or not known	no	No
female	tested , positive for any	HIV outpatient clinic	yes	Yes, regularly
MSM	tested, negative for all	HIV outpatient clinic	no	No
MSM	tested, negative for all	HIV outpatient clinic	yes	Yes, regularly
MSM	tested, negative for all	General practitioner	no	Yes, regularly
Hetm	not tested	Not tested or not known	no	Yes, if at risk
MSM	not tested	Not tested or not known	no	Yes, regularly
MSM	tested , positive for any	HIV outpatient clinic	yes	Yes, regularly
MSM	tested , positive for any	HIV outpatient clinic	yes	Yes, regularly
female	not tested	Not tested or not known		Yes, regularly
female	tested , positive for any	HIV outpatient clinic	yes	Yes, if at risk
MSM	not tested	Not tested or not known	yes	Yes, regularly
MSM	not tested	Not tested or not known	yes	Yes, if symptoms present
Hetm	not tested	Not tested or not known	yes	No
MSM	not tested	Not tested or not known	yes	Yes, regularly
MSM	tested, negative for all	HIV outpatient clinic	yes	Yes, regularly
female	not tested	Not tested or not known	no	Yes, regularly
MSM	not tested	Not tested or not known	no	Yes, regularly
Hetm	not tested	Not tested or not known	no	No
MSM	tested , positive for any	General practitioner	yes	Yes, regularly
Hetm	unknown	Not tested or not known	yes	Yes, regularly
female	not tested	Not tested or not known	yes	Yes, regularly
Hetm	not tested	Not tested or not known	yes	Yes, regularly
Hetm	not tested	Not tested or not known	yes	Yes, if symptoms present
MSM	tested , positive for any	HIV outpatient clinic	yes	Yes, regularly
MSM	tested, negative for all	HIV outpatient clinic	yes	Yes, regularly
Hetm	tested , positive for any	HIV outpatient clinic	yes	Yes, if symptoms present
female	not tested	Not tested or not known	yes	Yes, regularly
Hetm	not tested	Not tested or not known	yes	Yes, if at risk
MSM	not tested	Not tested or not known	yes	Yes, regularly
female	tested , positive for any	HIV outpatient clinic	yes	Yes, regularly
MSM	not tested	Not tested or not known	yes	Yes, regularly
MSM	tested , positive for any	HIV outpatient clinic	yes	Yes, regularly
MSM	tested, negative for all	HIV outpatient clinic	yes	Yes, regularly
Hetm	not tested	Not tested or not known	yes	Yes, if at risk
MSM	tested, negative for all	HIV outpatient clinic	no	Yes, if at risk
Hetm	tested, negative for all	HIV outpatient clinic	yes	Yes, regularly
MSM	not tested	Not tested or not known	yes	Yes, regularly
MSM	unknown	Not tested or not known	yes	Yes, regularly
MSM	tested, negative for all	HIV outpatient clinic	no	Yes, regularly
Hetm	unknown	Not tested or not known
MSM	tested, negative for all	HIV outpatient clinic	yes	Yes, regularly
MSM	tested , positive for any	HIV outpatient clinic	yes	Yes, regularly
MSM	not tested	Not tested or not known	yes	Yes, if at risk
female	unknown	Not tested or not known	yes	Yes, regularly
MSM	not tested	Not tested or not known	yes	Yes, if symptoms present
MSM	not tested	Not tested or not known	yes	Yes, regularly
female	not tested	Not tested or not known	yes	Yes, regularly
MSM	tested , positive for any	HIV outpatient clinic	no
Hetm	tested , positive for any	HIV outpatient clinic	no	Yes, if symptoms present
female	tested, negative for all	Gynaecologist
MSM	tested, negative for all	HIV outpatient clinic	yes	No
Hetm	not tested	Not tested or not known		Yes, regularly
MSM	not tested	Not tested or not known	yes	Yes, regularly
female	not tested	Not tested or not known	no	Yes, regularly
female	not tested	Not tested or not known	yes	No
female	not tested	Not tested or not known	no	Yes, regularly
MSM	tested, negative for all	HIV outpatient clinic	no	Yes, regularly
female	not tested	Not tested or not known	no	No
Hetm	not tested	Not tested or not known	yes	Yes, if symptoms present
MSM	tested, negative for all	HIV outpatient clinic	yes	Yes, regularly
MSM	unknown	Not tested or not known	yes	Yes, if at risk
MSM	tested, negative for all	HIV outpatient clinic	yes	Yes, regularly
Hetm	not tested	Not tested or not known	yes	Yes, regularly
female	not tested	Not tested or not known	yes	Yes, regularly
Hetm	tested, negative for all	General practitioner	yes	Yes, if symptoms present
MSM	tested, negative for all	HIV outpatient clinic	yes	Yes, regularly
Hetm	not tested	Not tested or not known	yes	Yes, regularly
MSM	not tested	Not tested or not known	no	Yes, if symptoms present
MSM	not tested	Not tested or not known	yes	Yes, regularly
female	tested , positive for any	Gynaecologist	yes	No
Hetm	not tested	Not tested or not known	yes	Yes, regularly
MSM	tested, negative for all	HIV outpatient clinic	yes	Yes, if symptoms present
MSM	tested , positive for any	HIV outpatient clinic	no	Yes, regularly
Hetm	not tested	Not tested or not known	no	No
Hetm	not tested	Not tested or not known	no	Yes, if at risk
MSM	tested , positive for any	HIV outpatient clinic	no	Yes, regularly
Hetm	unknown	Not tested or not known	yes
female	tested, negative for all	HIV outpatient clinic	yes	No
MSM	tested, negative for all	HIV outpatient clinic	yes	Yes, regularly
female	tested, negative for all	HIV outpatient clinic	no	No
MSM	not tested	Not tested or not known	no	Yes, regularly
female	unknown	Not tested or not known	yes	Yes, if symptoms present
MSM	tested, negative for all	HIV outpatient clinic	yes	Yes, regularly
MSM	tested, negative for all	HIV outpatient clinic	yes	Yes, regularly
MSM	not tested	Not tested or not known	yes	Yes, regularly
MSM	not tested	Not tested or not known	no	No
Hetm	tested, negative for all	STI specialist	yes	Yes, regularly
female	not tested	Not tested or not known	no	No
MSM	tested , positive for any	HIV outpatient clinic	no	Yes, regularly
female	not tested	Not tested or not known	no	Yes, if at risk
Hetm	not tested	Not tested or not known	yes	Yes, regularly
MSM	not tested	Not tested or not known	no	Yes, if at risk
MSM	not tested	Not tested or not known	yes	Yes, regularly
MSM	not tested	Not tested or not known	yes	Yes, if symptoms present
MSM	tested , positive for any	HIV outpatient clinic	yes	Yes, regularly
female	tested, negative for all	HIV outpatient clinic	yes	No
MSM	tested , positive for any	HIV outpatient clinic	yes	Yes, regularly
Hetm	unknown	Not tested or not known	yes	Yes, regularly
female	not tested	Not tested or not known	yes	No
MSM	not tested	Not tested or not known	yes	Yes, regularly
Hetm	not tested	Not tested or not known	no	Yes, if at risk
Hetm	not tested	Not tested or not known	no	No
female	tested, negative for all	Gynaecologist	yes	Yes, if symptoms present
Hetm	not tested	Not tested or not known	yes	Yes, if symptoms present
MSM	not tested	Not tested or not known	no	Yes, regularly
female	unknown	Not tested or not known	no	No
Hetm	not tested	Not tested or not known	no	Yes, regularly
MSM	tested , positive for any	HIV outpatient clinic	yes	Yes, regularly
female	unknown	Not tested or not known	no	No
Hetm	not tested	Not tested or not known	yes	Yes, if symptoms present
MSM	tested , positive for any	HIV outpatient clinic	yes	Yes, regularly
MSM	not tested	Not tested or not known	no	Yes, regularly
MSM	tested , positive for any	HIV outpatient clinic	yes	Yes, regularly
Hetm	not tested	Not tested or not known	yes	Yes, if at risk
Hetm	not tested	Not tested or not known	yes	Yes, if symptoms present
female	tested , positive for any	HIV outpatient clinic	yes	Yes, regularly
MSM	not tested	Not tested or not known	yes	Yes, regularly
female	not tested	Not tested or not known	yes	Yes, if at risk
female	not tested	Not tested or not known	yes	Yes, if symptoms present
Hetm	not tested	Not tested or not known	no	No
MSM	unknown	Not tested or not known	yes	Yes, regularly
Hetm	not tested	Not tested or not known	yes	Yes, if symptoms present
MSM	tested, negative for all	HIV outpatient clinic	yes	Yes, regularly
